# Supplementary material for: Coping Flexibility and Health-Related Quality of Life Among Older Adults: The Compensatory Effect of Co-rumination
Source: Front Psychol. 2019 Jan 23;10:59. doi: 10.3389/fpsyg.2019.00059 (PMC6351461; doi:10.3389/fpsyg.2019.00059)
Supplement: DATA S1 — Coping in old age-coping flexibility. Dataset for “Coping flexibility and health-related quality of life among older adults: compensatory effect of co-rumination” in.sav format. [file Data_Sheet_1.CSV]

1	92	1	7	1	0	77	2	999	2	999	2	999	8	999	22	999	18	999	6	20
2	82	1	6	1	0	35	2	999	4	999	2	999	3	999	14	999	11	999	4	19
3	74	0	11	1	1	21	2	999	8	999	2	999	8	999	23	999	27	999	3	22
4	91	0	11	1	0	7	6	999	7	999	4	999	8	999	23	999	18	999	6	22
5	69	0	10	1	0	84	2	2	2	2	2	2	2	2	31	27	999	18	6	24
6	99	0	7	1	0	70	3	999	8	999	4	999	4	999	26	999	21	999	6	15
7	90	1	7	1	0	42	3	999	4	999	7	999	6	999	13	999	16	999	6	20
8	75	1	12	1	0	28	6	999	8	999	4	999	6	999	24	999	26	999	6	24
9	73	0	11	1	0	56	3	2	4	3	3	3	4	4	25	999	24	999	6	23
10	68	0	9	1	0	4	3	999	2	999	3	999	5	999	21	999	23	999	5	24
11	75	0	7	1	0	24	3	999	3	999	6	999	4	999	28	999	23	999	6	24
12	70	0	7	1	1	0	4	999	5	999	2	999	7	999	23	999	20	999	6	24
13	93	0	7	1	0	42	5	999	5	999	4	999	4	999	24	999	18	999	5	9
14	67	0	10	1	0	49	8	999	7	999	8	999	8	999	18	999	19	999	6	22
15	69	1	2	1	0	21	5	999	7	999	6	999	8	999	24	999	17	999	5	13
16	85	1	14	1	0	105	8	999	8	999	6	999	8	999	23	999	14	999	6	17
17	94	1	7	1	0	0	8	999	8	999	8	999	8	999	31	999	25	999	6	19
18	76	1	7	1	0	49	5	999	5	999	6	999	6	999	17	999	21	999	6	23
19	65	0	20	1	0	8	2	999	3	999	2	999	5	999	23	999	26	999	6	24
20	83	1	12	1	0	10	5	999	8	999	8	999	2	999	22	999	23	999	6	16
21	81	1	14	1	0	9	2	999	2	999	4	999	7	999	28	999	28	999	6	21
22	92	1	30	1	0	8	2	999	2	999	2	999	8	999	25	999	30	999	6	21
23	78	1	20	1	0	9	2	999	2	999	2	999	8	999	16	999	20	999	5	14
24	82	1	15	1	0	8	2	999	2	999	8	999	8	999	35	999	30	999	6	24
25	89	1	12	1	0	10	2	999	2	999	2	999	3	999	8	999	24	999	1	10
26	88	1	14	1	0	10	8	999	8	999	2	999	8	999	13	999	22	999	6	21
27	85	1	17	1	0	14	2	999	2	999	2	999	6	999	18	999	21	999	6	16
28	94	1	12	1	0	10	5	999	2	999	8	999	2	999	18	999	19	999	6	15
29	82	1	12	1	0	5	2	999	2	999	2	999	2	999	21	999	19	999	6	24
30	81	1	21	1	0	6	2	999	2	999	2	999	8	999	23	999	23	999	6	24
31	84	1	11	1	0	5	8	999	7	999	2	999	7	999	17	999	20	999	6	17
32	86	1	14	1	0	5	4	999	4	999	4	999	7	999	26	999	28	999	6	19
33	84	0	18	1	0	8	2	999	2	999	2	999	6	999	29	999	21	999	6	24
34	85	1	11	1	0	5	2	999	2	999	2	999	6	999	20	999	19	999	5	12
35	90	1	8	1	0	3	2	999	2	999	2	999	8	999	34	999	24	999	6	24
36	87	1	14	1	0	7	2	999	2	999	2	999	8	999	27	999	30	999	6	23
37	88	1	13	1	0	10	2	999	5	999	2	999	2	999	17	999	25	999	6	16
38	89	1	19	1	0	5	2	999	2	999	6	999	4	999	28	999	26	999	5	20
39	90	1	10	1	0	8	6	999	5	999	4	999	6	999	13	999	23	999	6	16
40	85	1	13	1	0	1	4	999	2	999	4	999	8	999	27	999	24	999	6	23
41	90	0	6	1	0	3	8	999	8	999	2	999	2	999	19	999	20	999	6	19
42	79	1	11	1	0	10	8	999	8	999	5	999	8	999	15	999	26	999	6	22
43	85	1	15	1	0	10	6	999	7	999	3	999	2	999	11	999	16	999	6	20
44	65	0	11	1	0	28	5	2	8	2	5	4	8	8	31	29	27	23	6	24
45	90	0	12	1	0	84	2	2	2	2	2	2	5	2	25	23	21	27	6	24
46	82	0	14	1	0	42	2	8	5	8	2	2	5	8	26	21	21	24	6	24
47	86	1	7	1	0	35	5	5	6	4	4	2	8	7	26	29	27	26	6	24
48	73	0	17	1	0	21	8	7	8	6	2	3	8	8	19	26	23	25	6	16
49	86	0	14	1	0	35	2	5	4	2	5	8	5	5	26	23	25	22	6	22
50	80	0	7	1	1	28	2	2	3	3	7	5	3	2	30	35	29	25	6	24
51	75	1	7	1	1	0	2	2	2	2	8	3	3	2	32	35	29	25	6	24
52	85	1	11	1	0	49	2	3	2	3	4	8	8	8	25	29	29	29	5	14
53	89	1	12	1	0	91	3	2	3	2	6	2	8	6	34	29	30	27	5	16
54	75	1	7	1	0	91	8	8	8	8	4	4	6	6	32	35	21	26	6	24
55	64	0	16	1	0	28	2	2	3	7	2	2	5	7	31	31	29	28	6	24
56	86	1	12	1	0	70	3	8	3	8	2	2	7	2	21	19	21	22	6	24
57	95	1	17	1	0	21	2	2	7	3	2	2	5	3	33	31	27	27	6	22
58	68	0	8	1	1	84	5	6	4	6	2	6	7	6	26	25	24	23	6	23
59	78	1	12	1	0	35	3	4	5	3	3	2	3	2	26	29	24	26	6	22
60	67	1	14	1	1	60	2	2	2	2	2	2	2	2	28	22	24	22	6	22
61	66	0	12	1	1	0	3	2	4	2	4	3	5	5	25	23	20	21	6	24
62	73	1	13	1	0	42	2	2	5	2	2	2	5	3	23	21	24	23	6	24
63	79	0	15	1	1	70	2	2	2	3	2	2	2	2	24	23	25	22	6	24
64	75	1	11	1	0	7	3	3	3	2	4	2	6	4	26	28	23	23	6	24
65	67	0	10	1	0	14	7	4	6	4	2	4	6	4	29	26	22	20	6	24
66	83	1	8	1	0	105	2	2	5	5	2	5	7	8	24	19	22	19	6	24
67	89	1	7	1	0	119	2	2	5	2	2	7	5	7	23	18	24	20	5	19
68	88	1	7	1	0	70	4	4	5	5	2	2	5	8	23	23	25	26	6	14
69	76	1	10	1	0	56	2	3	3	3	2	2	7	8	21	16	25	21	6	17
70	80	0	7	1	0	0	4	2	6	3	8	8	5	6	30	32	26	28	6	24
71	88	1	17	1	0	154	8	8	8	8	8	8	8	8	26	22	30	18	5	14
72	66	1	12	1	0	21	2	2	2	2	2	2	2	2	28	25	26	21	6	24
73	69	1	12	1	0	21	2	2	5	5	2	2	8	7	22	25	27	24	6	20
74	62	1	16	1	0	14	5	2	5	2	8	2	8	8	25	26	21	21	6	22
75	75	0	11	1	0	42	8	8	8	5	7	8	6	5	18	18	19	25	6	21
76	82	1	10	1	0	63	8	5	7	5	8	2	8	8	24	16	20	15	6	14
77	89	1	10	1	0	28	4	2	2	6	7	4	7	5	18	21	15	17	5	14
78	81	1	15	1	0	28	3	2	2	2	2	2	7	4	23	25	22	24	6	24
79	92	0	9	1	0	28	7	3	8	8	8	6	7	4	17	13	18	17	6	18
80	77	1	7	1	0	63	8	2	8	4	8	8	7	2	22	21	22	20	6	24
81	90	1	7	1	0	28	2	2	5	2	2	2	2	4	32	17	25	22	6	18
82	81	1	7	1	0	98	3	5	4	2	2	6	5	2	24	21	22	22	6	23
83	89	1	11	1	0	42	2	5	2	2	2	2	2	4	23	23	22	20	0	11
84	83	0	13	1	0	70	2	2	8	2	2	2	2	2	999	27	23	18	6	19
85	74	0	9	1	0	28	2	999	2	2	3	2	2	999	29	26	999	17	6	20
86	64	1	10	1	0	35	5	2	2	2	6	8	5	4	30	32	28	27	6	20
87	77	1	7	1	0	21	8	6	5	8	8	6	8	5	29	26	999	21	6	23
88	62	1	14	1	0	49	8	8	8	8	4	8	8	6	27	999	28	23	6	24
89	83	0	17	1	0	70	6	6	5	7	4	4	6	5	20	20	20	23	6	24
90	64	1	7	1	0	49	3	8	7	8	8	8	5	8	26	22	24	21	6	23
91	81	0	14	1	0	0	8	2	4	2	8	2	7	2	25	24	21	24	6	24
92	95	1	16	1	0	84	2	2	2	3	2	2	4	2	25	23	24	24	6	20
93	90	1	16	1	0	28	2	2	4	4	2	2	4	4	21	11	25	22	6	19
94	89	1	12	1	0	53	5	4	6	3	3	2	6	4	15	21	23	23	5	19
95	90	1	18	1	0	105	2	8	3	8	2	6	2	4	16	20	22	20	6	17
96	89	0	7	1	0	21	4	4	7	8	3	6	3	2	18	19	23	20	6	23
97	65	0	17	1	0	70	2	3	5	2	2	5	3	4	27	31	22	21	6	19
98	74	1	12	1	0	21	4	4	4	4	4	5	6	6	20	21	19	18	6	24
99	67	1	7	1	1	22	2	4	2	5	6	4	3	3	16	23	16	20	5	21
100	88	1	4	1	1	24	5	3	3	3	6	4	4	4	13	23	999	21	5	17
101	79	0	15	1	0	21	2	2	2	5	3	7	2	6	26	24	19	17	6	23
102	65	1	10	1	0	14	3	2	3	2	4	2	6	4	26	26	22	20	6	24
103	84	0	7	1	1	42	5	2	6	2	3	2	6	2	16	22	17	17	6	12
104	80	0	10	1	1	49	6	3	7	2	3	2	5	6	26	25	19	18	6	23
105	61	0	17	1	0	35	5	6	6	7	3	6	4	5	20	21	19	18	6	23
106	87	1	13	1	0	42	2	3	3	4	2	2	8	6	31	21	27	25	5	21
107	75	1	11	1	0	56	2	4	3	7	2	4	7	6	21	20	21	20	6	24
108	75	1	13	1	0	98	6	6	6	7	7	7	5	3	21	13	14	12	6	20
109	71	0	10	1	0	0	6	2	5	2	8	2	5	2	26	26	21	18	6	19
110	75	0	12	1	0	28	7	8	8	7	8	7	7	7	21	18	18	16	6	24
111	66	0	7	1	0	0	3	3	3	4	3	3	4	4	27	28	20	19	6	24
112	76	1	10	1	0	42	8	8	7	7	2	2	5	5	16	24	22	21	6	23
113	73	0	7	1	0	7	6	6	6	8	3	4	6	6	27	26	16	19	5	23
114	68	0	16	1	0	35	6	2	6	4	8	4	6	4	29	26	21	20	6	24
115	70	1	9	1	0	35	8	6	8	8	2	3	8	8	20	21	19	20	6	15
116	96	1	10	1	0	84	8	4	8	3	8	7	6	6	22	14	25	12	3	13
117	87	1	10	1	0	21	2	2	2	2	2	2	8	8	23	20	27	20	3	12
118	69	0	7	1	0	0	7	5	4	8	2	2	3	7	21	23	24	22	6	24
119	85	1	7	1	0	56	3	2	5	2	6	5	8	8	22	22	23	20	3	14
120	89	1	12	1	0	35	8	5	8	2	8	2	8	8	31	25	21	18	5	16
121	88	1	7	1	0	70	7	4	8	7	8	7	8	8	22	21	22	20	6	20
122	68	0	10	1	0	21	2	7	2	8	7	8	7	7	19	17	17	19	6	22
123	89	1	6	1	0	42	8	6	6	6	8	8	8	6	32	22	25	20	3	10
124	75	0	7	1	0	98	5	3	7	6	5	3	5	4	21	24	21	23	6	24
125	88	1	7	1	0	35	6	5	8	4	4	8	5	5	27	23	20	23	6	19
126	65	1	12	1	0	0	6	8	5	8	4	6	6	7	15	9	15	13	5	20
127	68	0	3	1	0	0	2	2	2	5	2	5	2	2	23	19	20	18	6	15
128	70	0	7	1	0	35	2	5	7	7	2	2	5	8	22	24	19	19	6	24
129	77	0	11	1	0	35	5	6	6	7	4	4	4	6	23	24	19	19	6	24
130	63	0	13	1	0	49	2	2	6	7	6	5	5	8	19	24	20	22	6	21
131	75	0	7	1	0	105	8	8	8	8	8	8	8	8	21	25	20	20	5	19
132	71	0	11	1	0	0	5	5	5	4	6	6	6	6	21	20	15	16	6	16
133	73	1	10	1	0	70	7	7	5	8	5	2	6	5	24	23	13	18	6	18
134	76	1	15	1	0	56	4	4	5	4	3	3	6	5	21	21	24	23	6	19
135	80	1	10	1	0	70	5	8	8	8	2	2	8	8	23	21	20	20	6	23
136	84	1	8	1	0	56	4	2	6	2	3	2	8	6	18	18	16	23	6	21
137	92	1	11	1	0	49	6	5	5	8	2	7	7	4	22	22	14	17	4	16
138	89	1	14	1	0	28	2	2	8	6	4	2	2	2	13	18	10	10	2	14
139	80	1	9	1	0	49	8	5	8	8	8	8	8	8	20	27	23	21	6	24
140	83	1	3	1	0	35	7	7	8	8	8	8	8	7	21	19	16	19	4	15
141	81	1	6	1	0	91	5	2	4	4	4	2	4	6	14	12	19	16	6	12
142	65	0	9	1	0	49	6	5	8	8	2	2	5	3	12	12	10	8	6	18
143	90	1	11	1	0	42	2	4	2	4	2	2	2	2	18	17	20	16	6	24
144	87	1	16	1	0	28	5	2	2	8	2	2	2	5	20	23	15	11	6	17
145	75	1	11	1	0	42	8	8	8	8	2	2	2	2	11	11	7	12	1	11
146	86	1	12	1	0	77	5	999	8	8	8	8	999	999	17	23	999	26	6	13
147	80	1	13	1	0	108	7	6	7	6	7	999	6	5	17	23	999	20	5	24
148	77	0	17	1	0	56	2	4	8	5	8	4	5	2	22	10	17	17	6	23
149	69	1	10	1	0	70	5	8	8	8	2	2	3	2	999	999	999	14	4	15
150	75	1	7	1	0	91	6	7	8	4	4	6	2	2	15	12	15	999	6	20
151	85	1	12	1	0	21	8	3	7	4	3	2	5	4	20	19	19	19	6	22
152	72	0	12	1	0	52	2	3	4	3	2	2	3	2	25	19	17	16	4	20
153	82	1	9	1	0	84	8	8	8	8	8	8	2	3	12	13	14	13	5	22
154	69	1	12	1	0	56	8	7	8	8	8	8	5	2	21	20	20	20	6	20
155	84	1	16	1	0	56	2	3	4	5	2	2	3	3	24	17	21	20	6	19
156	84	1	12	1	0	140	5	8	6	8	2	4	2	2	18	12	13	14	4	18
157	89	1	7	1	0	112	7	3	3	3	6	6	4	2	12	16	13	14	1	13
158	83	1	9	1	0	49	6	7	7	7	8	5	7	3	13	17	17	13	6	11
159	74	0	10	1	0	35	6	8	7	7	3	5	3	2	16	19	10	8	6	21
160	72	1	11	1	0	21	2	2	5	2	2	2	4	5	20	20	15	14	5	24
161	88	1	7	1	0	21	6	7	8	7	6	8	4	3	21	17	21	16	5	13
162	86	1	13	1	0	42	4	5	4	5	4	4	4	3	11	13	15	14	6	15
163	88	1	7	1	0	70	8	8	8	8	8	4	7	7	21	22	19	17	6	19
164	75	1	4	1	0	0	8	5	8	8	8	8	7	7	24	29	23	23	6	24
165	68	1	7	1	0	84	7	7	6	6	2	5	5	3	23	16	16	16	6	21
166	76	1	9	1	0	84	6	8	6	7	2	5	6	2	24	12	20	14	6	23
167	63	1	17	1	0	28	4	2	5	2	2	2	4	2	23	26	18	17	6	24
168	79	1	11	1	0	35	4	3	3	2	3	5	4	7	22	14	14	14	4	23
169	64	1	7	1	0	63	4	8	4	8	4	8	6	8	20	17	15	14	4	13
170	75	1	12	1	0	42	5	7	8	5	6	8	8	6	28	18	20	14	5	14
171	83	0	11	1	0	119	3	2	7	4	8	4	8	5	25	16	24	20	5	17
172	76	0	9	1	0	14	2	6	2	6	6	5	7	5	22	27	17	13	6	24
173	85	1	7	1	0	105	8	7	8	3	5	2	2	3	28	24	10	13	5	23
174	79	0	4	1	0	49	4	2	4	3	8	2	7	3	12	22	12	15	5	16
175	77	1	2	1	1	14	7	8	8	5	8	8	8	8	21	22	22	16	5	14
176	70	0	12	1	0	0	5	5	5	8	7	8	8	8	28	24	18	22	6	24
177	72	0	13	1	0	21	8	8	8	8	8	8	8	8	17	15	22	17	6	18
178	64	1	10	1	0	70	5	6	5	7	3	4	5	5	18	19	19	14	5	13
179	61	0	8	1	0	28	5	5	2	5	8	2	5	2	25	13	22	11	6	24
180	92	1	15	1	0	21	2	5	2	5	2	2	4	2	21	20	14	15	4	15
181	73	1	12	2	0	42	4	999	5	999	3	999	6	999	26	999	19	999	6	24
182	90	1	4	2	0	14	3	999	3	999	8	999	6	999	31	999	23	999	6	24
183	82	1	9	2	0	0	5	999	5	999	6	999	8	999	26	999	28	999	6	24
184	83	1	12	2	0	35	7	999	7	999	3	999	6	999	20	999	11	999	6	23
185	90	0	13	2	0	84	6	999	2	999	3	999	6	999	27	999	20	999	6	23
186	86	1	9	2	0	90	8	999	8	999	8	999	4	999	19	999	17	999	5	19
187	69	1	10	2	0	56	3	999	4	999	5	999	5	999	26	999	27	999	6	24
188	81	1	7	2	1	56	4	999	4	999	6	999	7	999	24	999	28	999	6	24
189	72	0	9	2	1	16	8	999	8	999	2	999	7	999	20	999	17	999	6	24
190	85	1	3	2	0	0	3	999	6	999	5	999	6	999	35	999	29	999	6	20
191	86	1	8	2	0	84	6	999	6	999	7	999	8	999	28	999	27	999	5	18
192	79	1	12	2	0	90	5	999	5	999	5	999	5	999	19	999	18	999	6	24
193	88	1	18	2	0	14	4	999	7	999	3	999	6	999	20	999	20	999	6	24
194	70	0	7	2	1	14	4	999	4	999	4	999	6	999	33	999	27	999	6	22
195	68	1	8	2	1	35	8	999	7	999	8	999	6	999	22	999	23	999	6	24
196	67	1	10	2	0	42	8	999	8	999	6	999	8	999	19	999	18	999	6	23
197	65	1	14	2	0	50	3	999	3	999	4	999	4	999	27	999	25	999	6	24
198	79	1	4	2	0	14	5	999	4	999	5	999	4	999	24	999	14	999	6	23
199	82	1	13	2	0	21	4	999	5	999	3	999	3	999	21	999	20	999	6	24
200	71	1	10	2	0	30	4	999	4	999	5	999	5	999	19	999	18	999	6	21
201	74	0	10	2	0	20	2	999	3	999	2	999	3	999	28	999	25	999	6	24
202	69	0	12	2	0	12	2	999	2	999	2	999	2	999	29	999	24	999	6	24
203	85	1	4	2	0	21	4	999	999	999	999	999	999	999	25	999	20	999	6	23
204	70	0	14	2	0	7	7	4	6	7	3	3	7	8	26	27	23	26	6	24
205	67	1	17	2	0	77	2	2	2	2	4	5	7	8	25	21	27	25	6	22
206	65	1	15	2	0	77	2	2	2	2	2	2	5	8	20	17	22	24	6	24
207	83	0	14	2	1	35	2	2	2	2	2	2	8	2	24	34	24	29	6	24
208	65	0	10	2	0	28	4	5	6	5	6	5	5	6	22	19	20	21	6	24
209	65	1	17	2	1	21	2	2	2	2	2	2	6	8	29	26	27	28	6	24
210	69	1	14	2	1	21	2	2	2	3	2	4	8	5	30	28	28	29	6	24
211	94	1	7	2	0	56	4	5	5	4	3	7	3	6	32	26	21	19	5	20
212	75	1	7	2	0		5	2	5	2	8	2	8	6	25	24	19	21	5	23
213	70	0	10	2	1	7	3	2	3	2	2	2	5	6	25	26	21	24	6	20
214	67	0	16	2	1	0	3	2	4	2	2	2	5	2	30	31	25	25	6	24
215	65	1	17	2	1	7	2	2	2	2	2	2	5	7	25	23	28	28	6	24
216	81	1	6	2	0	110	8	8	8	8	8	8	8	8	21	21	23	23	6	24
217	66	0	11	2	1	56	2	2	3	3	2	2	4	4	27	27	26	24	6	24
218	69	1	12	2	1	80	2	2	3	4	2	4	3	4	27	24	24	24	6	24
219	86	1	10	2	0	25	2	2	4	5	2	2	7	8	23	23	28	28	6	24
220	75	1	15	2	0	6	4	2	4	2	4	2	4	2	33	30	23	25	6	24
221	66	1	11	2	0	42	2	2	2	2	6	6	4	4	25	25	20	24	6	23
222	80	1	10	2	0	20	3	2	5	3	4	3	5	3	24	27	23	24	6	23
223	73	1	8	2	1	35	2	2	4	2	2	2	6	2	27	25	24	24	6	24
224	80	1	7	2	0	14	6	5	5	3	7	3	6	3	28	30	22	21	6	23
225	81	1	4	2	0	0	5	3	6	3	6	3	6	2	30	32	24	25	6	24
226	77	1	9	2	0	77	2	2	2	2	8	4	8	6	21	26	23	23	6	24
227	69	1	12	2	0	28	3	2	2	2	8	8	8	8	20	23	22	24	6	24
228	61	1	13	2	0	7	4	3	6	6	3	3	5	4	24	22	20	20	6	24
229	60	1	14	2	1	28	4	5	3	3	2	2	6	5	34	30	29	24	6	24
230	63	1	17	2	1	0	2	2	2	2	2	2	2	2	29	27	26	27	6	24
231	66	0	12	2	1	0	2	2	2	2	2	2	2	5	27	30	27	28	6	24
232	77	1	7	2	0	70	5	2	5	2	2	2	8	2	24	30	22	27	6	24
233	76	0	11	2	0	7	4	4	4	6	4	3	4	6	24	20	22	21	6	23
234	75	1	14	2	0	35	2	8	2	8	2	4	7	7	24	19	18	23	6	24
235	75	1	15	2	0	49	5	7	8	6	5	2	8	6	21	22	20	21	6	22
236	85	0	15	2	0	21	5	2	5	2	2	2	8	2	23	30	18	22	6	22
237	70	0	14	2	0	42	2	3	3	2	2	3	4	4	19	27	19	20	6	24
238	81	1	17	2	0	56	7	5	7	7	6	4	7	6	14	14	19	21	6	23
239	85	1	9	2	0	98	5	2	3	5	4	6	5	3	15	13	17	16	5	21
240	89	1	12	2	0	28	3	2	4	4	2	2	6	8	26	24	17	19	6	24
241	75	1	14	2	0	42	8	7	8	7	4	6	8	8	19	15	18	18	6	23
242	86	1	12	2	0	7	8	5	8	8	2	8	8	8	14	22	19	23	6	24
243	100	0	16	2	0	84	5	2	6	3	3	3	8	4	20	18	18	16	6	21
244	86	1	10	2	0	70	2	2	4	4	6	3	4	7	22	18	21	20	5	22
245	66	1	12	2	1	21	2	2	2	2	2	2	2	2	29	29	21	22	6	24
246	70	0	12	2	1	84	4	4	4	4	4	4	4	4	12	13	18	18	5	9
247	65	1	15	2	1	7	4	4	3	3	4	4	6	6	20	21	19	19	6	24
248	65	1	6	2	0	14	5	2	5	2	7	2	7	2	20	21	20	19	6	24
249	65	1	12	2	0	80	8	7	7	8	5	5	7	6	22	19	17	18	6	24
250	85	1	7	2	0	105	2	2	2	4	2	5	3	3	20	17	21	21	6	21
251	89	1	11	2	0	28	5	4	6	7	2	2	3	2	25	24	23	23	6	21
252	71	1	17	2	1	7	4	4	3	3	4	4	5	4	26	28	21	23	6	24
253	75	0	11	2	1	56	4	4	4	5	4	4	7	7	23	22	22	21	6	24
254	69	1	11	2	0	28	2	5	2	2	8	4	8	7	26	27	26	22	6	24
255	64	0	11	2	1	21	2	2	3	4	2	2	6	6	31	30	28	26	6	24
256	67	1	11	2	1	70	8	8	8	7	3	5	6	4	19	21	21	21	6	21
257	76	0	10	2	1	105	5	5	7	7	5	6	4	6	20	22	20	18	6	21
258	61	1	13	2	0	21	4	5	3	3	4	4	5	5	23	23	20	19	6	24
259	69	1	11	2	1	77	4	4	4	4	8	6	6	6	23	23	22	23	6	24
260	63	0	9	2	0	35	4	3	5	5	6	7	7	7	25	20	25	19	6	24
261	75	0	7	2	1	28	4	4	4	4	8	7	2	3	29	28	20	18	6	17
262	74	0	10	2	0	0	2	2	3	3	2	2	3	5	29	25	24	22	6	24
263	61	0	8	2	0	14	3	4	2	4	4	2	7	6	26	26	21	20	6	22
264	68	0	8	2	1	21	2	2	2	4	4	4	7	5	32	25	20	19	6	24
265	77	1	11	2	0	14	5	5	2	5	5	8	5	8	29	22	22	14	6	24
266	75	1	16	2	0	49	5	8	4	2	2	2	8	7	29	21	17	16	6	23
267	77	0	14	2	0	70	7	5	7	6	5	7	5	8	19	19	14	16	6	17
268	82	1	7	2	0	49	2	4	3	6	4	4	6	6	17	17	19	18	5	12
269	72	1	7	2	0	42	8	5	5	5	8	6	6	6	20	17	16	18	6	20
270	66	1	12	2	0		5	6	4	8	2	3	5	6	25	24	18	18	6	24
271	75	0	17	2	0	56	8	5	7	5	8	7	6	7	14	14	16	14	6	24
272	66	1	16	2	1	7	2	2	8	8	5	5	3	3	23	25	17	18	6	24
273	69	0	12	2	1	12	2	2	2	2	2	2	2	2	23	23	21	21	6	24
274	73	1	13	2	1	42	5	5	4	2	2	2	2	2	15	14	15	16	6	24
275	64	1	10	2	1	70	6	6	7	7	8	6	7	7	25	25	26	22	5	24
276	67	0	11	2	1	28	7	7	6	7	5	7	6	6	23	23	24	26	5	24
277	70	1	8	2	1	70	4	5	4	6	8	7	3	4	18	15	19	20	6	24
